# Supplementary material for: A comparative thermal, optical, morphological and mechanical properties studies of pristine and C15A nanoclay-modified PC/PMMA blends: a critical evaluation of the role of nanoclay particles as compatibilizers
Source: Royal Society of Chemistry journal article supplement (doi:10.1039/c3ra40543e), 2013-01-01
Supplement: c3ra40543e.pdf [file c3ra40543e.pdf]

**A comparative thermal, optical, morphological and mechanical properties studies of pristine and C15A nanoclay-modified PC/PMMA blends: A critical evaluation of the role of nanoclay particles as compatibilizers**

A. K. Singh, Rajiv Prakash and Dhananjai Pandey\*

School of Materials Science & Technology  
Indian Institute of Technology (Banaras Hindu University)  
Varanasi-221005, India

**Keywords:** Organically modified nanoclays, compatibilization, PC/PMMA blends, polycarbonate, poly(methyl methacrylate)

---

\*Author to whom correspondence should be addressed; electronic mail:  
dp.mst1979@gmail.com

## Characterization

DSC (Mettler-Toledo, 823) thermograms were used to measure the glass transition temperature ( $T_g$ ) of the PC/PMMA blends. As it is well known in literature [19-20], reproducible results free from prior thermal history effects are obtained only after quenching the sample from a temperature well above  $T_g$  and then recording the thermograms. Accordingly, the second run DSC thermogram was recorded to measure the  $T_g$ . For measuring this, first we heated the pristine blend from 30 to 300 °C at a heating rate of 20 °C/min under nitrogen atmosphere, and then cooled the sample with the maximum possible cooling rate of 45 °C/min. (available with the DSC) which constituted the first DSC run. After this, we reheated the sample from 30 to 300 °C at a heating rate of 20 °C/min for recording the DSC data in the second run. Before using the DSC machine, it was calibrated with indium and zinc.

Thermal degradation behaviour of the pristine and compatibilized blends was studied using TGA (Mettler-Toledo, TGA/DSC-1) at a heating rate of 20 °C/ min under nitrogen and air atmosphere. The degradation temperature was measured corresponding to 5% weight loss of the sample.

The nanostructure of C15A nanoclay modified PC/PMMA blends were studied by Bruker AXS D8 Advance wide-angle X-ray diffractometer with Cu  $K\alpha$  radiation and a graphite monochromator (wavelength,  $\lambda = 0.154$  nm). The generator was operated at 40 kV and 40 mA. The film samples (except for C15A nanoclay which was placed in powder form) were placed on a quartz sample holder at room temperature and were scanned at diffraction angle  $2\theta$  from 1° to 40° at the scanning rate of 1°/ min.

FT-IR measurements were conducted in transmission mode in a Thermo Scientific FTIR spectrometer (model: NICOLET 6700) from 650 to 4000  $\text{cm}^{-1}$  with a resolution of 2  $\text{cm}^{-1}$ . Each spectrum was the average of thirty two scans.

$^1\text{H}$  NMR spectra were recorded on a Bruker 400 MHz spectrometer (Avance 400) at ambient temperature in  $\text{CDCl}_3$  solvent. The chemical shifts are reported in ppm relative to tetramethylsilane.

UV/Vis spectrophotometer (Lambda 25, Perkin Elmer, Germany) was used to measure the optical transmittance of PC/PMMA blends, in the range of 400-950 nm. The sample thickness was 2 mm.

Stress-strain behaviour was measured on the injection-molded tensile specimens using an Instron 3369 tensile tester at a strain rate of 2 mm/min at room temperature. Several samples were tested to obtain better error estimation.

Surface morphology was examined under field emission gun based SEM (ZEISS, model: SEM-Supra 40) operating at an accelerating voltage of 10 kV. The samples were sputter coated with gold before SEM examination to avoid charging.

The dispersion of C15A nanoclay within the blend matrix was examined by TEM using a Tecnai G2 20, FEI Corporation apparatus operating at an accelerating voltage of 200 kV. A thin layer of specimens were prepared by ultramicrotoming the blends with a diamond knife.

### Thermal degradation behaviour of different organically modified nanoclays

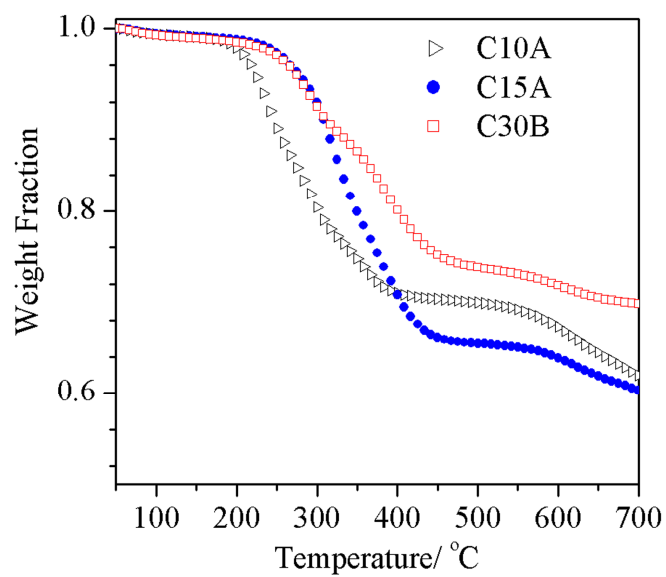

**Figure S1** TGA thermograms of C30B, C10A and C15A nanoclays taken in N<sub>2</sub> atmosphere.

## Optimization of C15A nanoclay content for getting homogeneous PC/PMMA blends

In order to optimize the content of C15A nanoclay for getting homogeneous PC/PMMA blends, we prepared PC/20PMMA blends with different nanoclay contents (2, 3 and 4%). Fig S2 shows second run DSC thermograms of these blends.

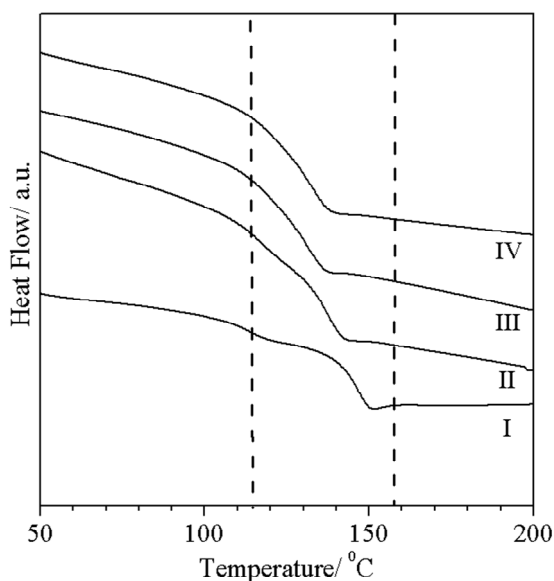

**Figure S2** Second run DSC thermograms of (I) PC/20PMMA, (II) PC/20PMMA + 2% C15A, (III) PC/20PMMA + 3% C15A, and (IV) PC/20PMMA + 4% C15A. Vertical dotted lines are corresponding to the glass transition temperature of pure PMMA and PC, respectively.

Similar to the pristine PC/20PMMA blend, DSC thermogram of PC/20PMMA blend containing 2% of C15A nanoclay also shows two distinguishable  $T_g$ s corresponding to PMMA and PC-rich phases with slightly more shift suggesting better compatibility in PC/20PMMA + 2% C15A blend. On increasing the nanoclay content from 2 to 3%, we observed much larger shift in the  $T_g$  of PC. However, the shift in  $T_g$  of PMMA is comparable to that in PC/20PMMA blend prepared using 2% C15A. Unlike the PC/20PMMA blend prepared using 2% C15A here the glass transition is quite diffuse. On

further increasing the C15A content from 3 to 4% we did not observe any significant change in glass transition temperature, which suggests that 3% of C15A nanoclay is optimum for getting the compatibilized and homogeneous PC/PMMA blends. So, we prepared compatibilized PC/PMMA blends in whole composition range using 3% of C15A nanoclay.

### First derivative of second run DSC thermograms of pristine PC/PMMA blends

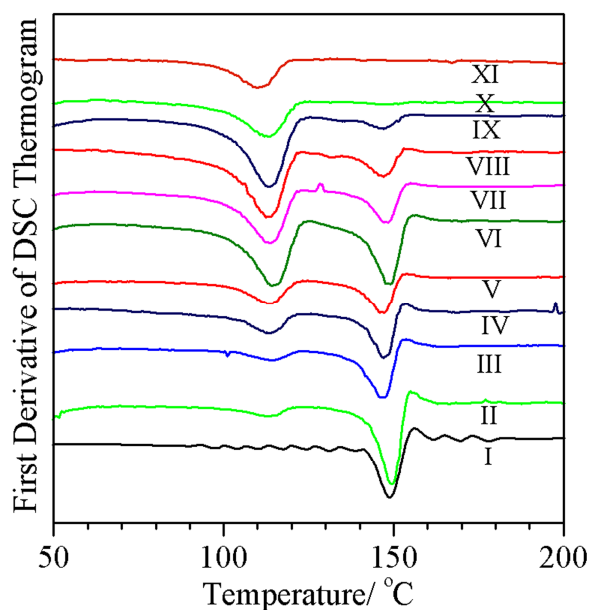

**Figure S3** First derivative of second run DSC thermograms of PC/PMMA blend prepared using melt extrusion technique: (I) PC, (II) PC/10PMMA, (III) PC/20PMMA, (IV) PC/30PMMA, (V) PC/40PMMA, (VI) PC/50PMMA, (VII) PC/60PMMA, (VIII) PC/70PMMA, (IX) PC/80PMMA, (X) PC/90PMMA, and (XI) PMMA.

### Optical transparency of Pristine and C15A nanoclay modified PC/PMMA blends

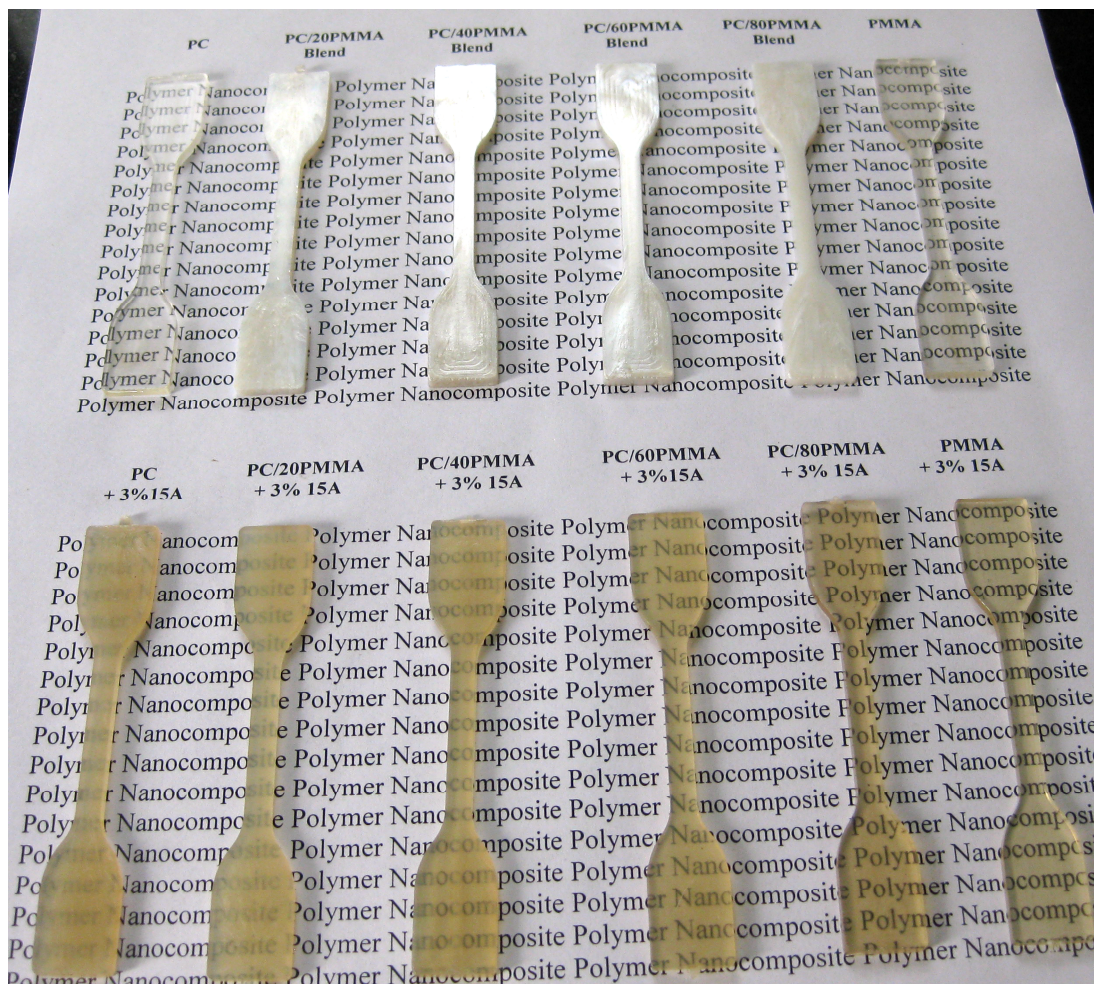

**Figure S4:** Digital photograph of tensile test specimens of pristine and C15A nanoclay modified PC/PMMA blends, showing optical transparency.



### **FTIR evidence for interaction between PC and PMMA phases in the compatibilized blends**

FTIR spectra of pristine and C15A nanoclay modified PC, PMMA and PC/PMMA blends, in the wave number range  $1000\text{-}2000\text{ cm}^{-1}$ , are shown in Figs. S5 (a) and (b), respectively. The stretching vibration peak of carbonyl group is a singlet and is known to occur at  $1775\text{ cm}^{-1}$  and  $1731\text{ cm}^{-1}$  in pure PC and PMMA, respectively [21]. In the case of nanoclay modified PC and PMMA nanocomposites, these peaks occur at  $1776$  and  $1733\text{ cm}^{-1}$ , respectively. The peak corresponding to aromatic stretching of PC and the deformation of  $\text{CH}_3$  of  $\text{O-CH}_3$  group of PMMA, which are known to occur at  $1503$  and  $1442\text{ cm}^{-1}$  in pure PC and PMMA, respectively, are observed at  $1505$  and  $1445\text{ cm}^{-1}$  in nanoclay modified PC and PMMA, respectively. The blue shift in carbonyl group of PC and PMMA, aromatic stretching of PC and the deformation of  $\text{CH}_3$  of  $\text{O-CH}_3$  group of PMMA is although very little, it changes rather systematically in the C15A nanoclay modified PC/PMMA blends as a function of blend composition. This is shown in Fig. S5(c) for the carbonyl peak. It is interesting to note that the positions of the carbonyl peaks of PC and PMMA do not shift in the pristine PC/PMMA blends, whereas there is a perceptible blue shift in the carbonyl peak of PC with increasing PMMA content in the C15A nanoclay modified PC/PMMA blends, as can be seen from Fig.S5 (c). This suggests better interactions between the PC and PMMA phases in the blends prepared in the presence of C15A nanoclay.

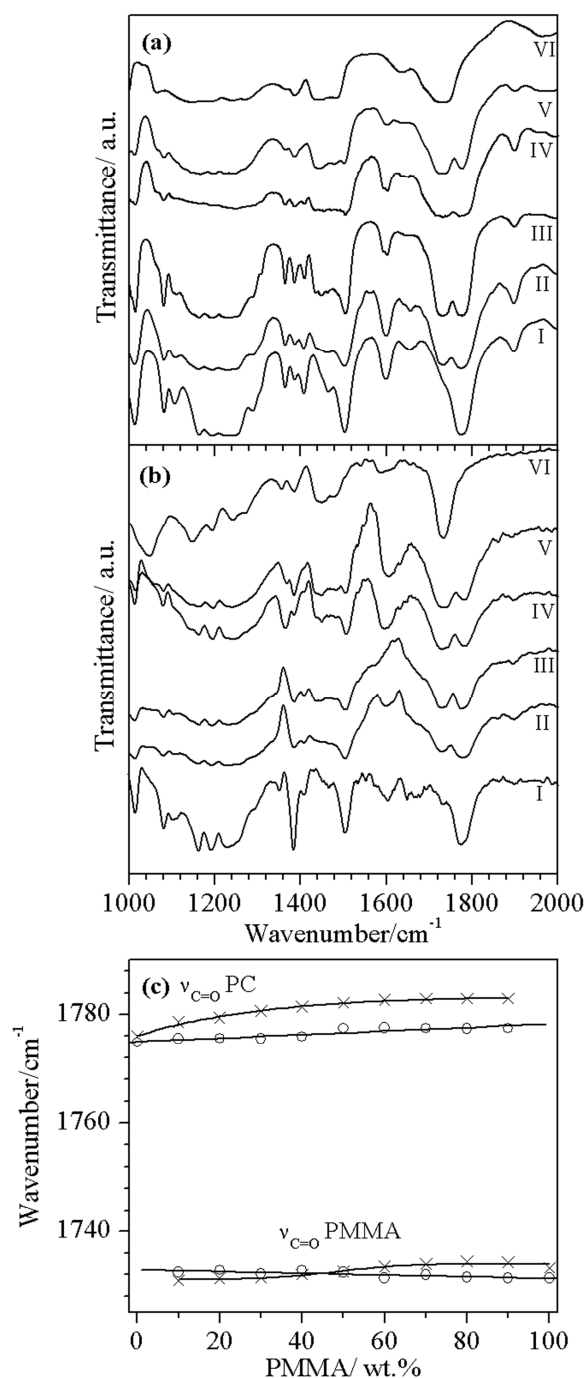

**Figure S5** FTIR spectra of (a) pristine and (b) 3% C15A nanoclay modified PC, PMMA and PC/PMMA blends prepared using melt extrusion technique: (I) PC, (II) PC/20PMMA, (III) PC/40PMMA, (IV) PC/60PMMA, (V) PC/80PMMA and (VI) PMMA. (c) Variation of carbonyl peak position of stretching vibration ( $\nu_{C=O}$ ) of PC and PMMA in PC/PMMA blends with C15A nanoclay (crosses) and without nanoclay (open circle) as a function of PMMA content.

## Mechanical properties data

**Table.S1** Mechanical properties of pristine and compatibilized PC/PMMA blends

| Sample              | Young's Modulus (GPa) | UTS (MPa) | Tensile Strain (%) | Toughness MJ/m <sup>3</sup> |
|---------------------|-----------------------|-----------|--------------------|-----------------------------|
| PC                  | 1.14                  | 61.6      | 67.5               | 33.5                        |
| PC/10PMMA           | 1.15                  | 62        | 57.9               | 28.1                        |
| PC/20PMMA           | 1.18                  | 65.4      | 47                 | 26.6                        |
| PC/30PMMA           | 1.22                  | 66.5      | 43.9               | 25.2                        |
| PC/40PMMA           | 1.24                  | 66        | 36                 | 20.5                        |
| PC/50PMMA           | 1.30                  | 69.5      | 32.4               | 19.6                        |
| PC/60PMMA           | 1.33                  | 67.4      | 28.3               | 17.2                        |
| PC/70PMMA           | 1.34                  | 68.4      | 25                 | 15.7                        |
| PC/80PMMA           | 1.40                  | 72.6      | 16.9               | 11.7                        |
| PC/90PMMA           | 1.49                  | 74.3      | 10.0               | 7.78                        |
| PMMA                | 1.49                  | 74.5      | 11                 | 6.5                         |
| PC + 3% C15A        | 1.39                  | 66.8      | 8.5                | 5.3                         |
| PC/10PMMA + 3% C15A | 1.42                  | 37.9      | 3.0                | 0.6                         |
| PC/20PMMA + 3% C15A | 1.50                  | 51.8      | 4.2                | 1.2                         |
| PC/30PMMA + 3% C15A | 1.55                  | 56.2      | 4.6                | 1.5                         |
| PC/40PMMA + 3% C15A | 1.60                  | 38.9      | 2.7                | 0.6                         |
| PC/50PMMA + 3% C15A | 1.66                  | 37.1      | 2.5                | 0.5                         |
| PC/60PMMA + 3% C15A | 1.68                  | 33.9      | 2.2                | 0.4                         |
| PC/70PMMA + 3% C15A | 1.69                  | 57.8      | 4.4                | 1.4                         |
| PC/80PMMA + 3% C15A | 1.70                  | 59.5      | 4.9                | 1.7                         |
| PC/90PMMA + 3% C15A | 1.75                  | 62.9      | 4.6                | 1.7                         |
| PMMA + 3% C15A      | 1.77                  | 58.6      | 4.2                | 1.4                         |

**<sup>1</sup>H NMR data**

**Table S2** <sup>1</sup>H NMR peak positions of PC and PMMA in pure and C15A nanoclay modified PC, PMMA and PC/PMMA blends

| Sample                | <sup>1</sup> H NMR peak position of PC |       |              |       | <sup>1</sup> H NMR peak position of PMMA |                 |                 |
|-----------------------|----------------------------------------|-------|--------------|-------|------------------------------------------|-----------------|-----------------|
|                       | Benzene Ring                           |       | Methyl Group |       | Methyl Ester                             | CH <sub>2</sub> | CH <sub>3</sub> |
| PC                    | 7.261                                  | 7.239 | 7.175        | 7.153 | 1.677                                    |                 |                 |
| PMMA                  |                                        |       |              |       | 3.599                                    | 1.815           | 0.853           |
| PC<br>+ 3%C15A        | 7.241                                  | 7.167 |              | 1.674 |                                          |                 |                 |
| PC/60PMMA             | 7.252                                  | 7.231 | 7.165        | 7.144 | 1.670                                    | 3.602           | 1.822 0.856     |
| PC/60PMMA<br>+ 3%C15A | 7.231                                  | 7.155 |              | 1.665 | 3.588                                    | 1.807           | 0.836           |
| PMMA<br>+ 3%C15A      |                                        |       |              |       | 3.600                                    | 1.817           | 0.852           |
